# Supplementary material
Source: PubMed Central journal article supplement (PMC3811203)
Supplement: AEM.01849-13_zam999104762so1.pdf [file AEM.01849-13_zam999104762so1.pdf]

**Supplementary Table 1. Antibiotic MICs for environmental isolates.**

| Ribotype | Isolate   | MIC in $\mu\text{g ml}^{-1}$ |               |             |               |
|----------|-----------|------------------------------|---------------|-------------|---------------|
|          |           | Vancomycin                   | Metronidazole | Clindamycin | Ciprofloxacin |
| 010      | CD105HS14 | 0.19                         | 0.094         | 32          | 4             |
| 010      | CD105HS15 | 1                            | 0.064         | 0.016       | 3             |
| 010      | CD105HS16 | 0.38                         | 0.19          | 0.016       | 4             |
| 010      | CD105HS9  | 1                            | 0.19          | 0.016       | 6             |
| 001      | CD105HS23 | 0.19                         | 0.094         | 0.016       | 32            |
| 001      | CD105HS24 | 0.38                         | 0.016         | 0.016       | 2             |
| 001      | CD105HS25 | 1.5                          | 0.25          | 2           | 0.016         |
| 001      | CD105HS12 | 0.38                         | 0.25          | 0.016       | 32            |
| 220      | CD105HS22 | 0.75                         | 0.64          | 0.6         | 12            |
| 220      | CD105HS2  | 0.25                         | 0.032         | 0.064       | 3             |
| 220      | CD105HS6  | 1                            | 0.125         | 4           | 4             |
| 002      | CD105HS17 | 0.38                         | 0.23          | 0.125       | 0.5           |
| 002      | CD105HS7  | 0.016                        | 0.032         | 0.032       | 8             |
| 031      | CD105HS18 | 0.5                          | 0.25          | 0.016       | 32            |
| 031      | CD105HS19 | 0.38                         | 0.25          | 0.016       | 8             |
| 005      | CD105HS20 | 1                            | 1             | 32          | 32            |
| 005      | CD105HS10 | 1.5                          | 0.25          | 0.016       | 2             |
| 078      | CD105HS26 | 4                            | 0.125         | 0.5         | 6             |
| 078      | CD105HS27 | 0.5                          | 0.94          | 0.5         | 32            |
| 046      | CD105HS3  | 0.25                         | 0.25          | 8           | 32            |
| 014      | CD105HS4  | 0.5                          | 0.094         | 0.032       | 8             |
| 021      | CD105HS5  | 0.19                         | 0.19          | 0.032       | 4             |
| 027      | CD105HS8  | 0.38                         | 0.25          | 0.094       | 0.75          |
| 012      | CD105HS1  | 0.19                         | 0.064         | 0.047       | 32            |
| 106      | CD105HS21 | 0.19                         | 0.19          | 0.032       | 32            |
| N/A      | CD105HS28 | 0.38                         | 0.19          | 0.032       | 4             |
| N/A      | CD105HS11 | 0.5                          | 0.023         | 32          | 4             |

Abbreviations: MIC = minimum inhibitory concentration N/A = not assigned

**Supplementary Table 2. Comparison of phage release using inducing agents and untreated lysates using TEM.**

| Ribotype | Isolate | MMs |     |   | LTMs |     |   | SMVs |     |   | SVs |     |   | PTLPs |     |   |
|----------|---------|-----|-----|---|------|-----|---|------|-----|---|-----|-----|---|-------|-----|---|
|          |         | MC  | NFX | C | MC   | NFX | C | MC   | NFX | C | MC  | NFX | C | MC    | NFX | C |
| 031      | CD105HS |     |     | - |      |     | - |      |     | - |     |     | - | √     | √   | - |
| 010      | CD105HS | √   | √   | √ | √    | √   | √ |      |     |   |     |     |   | √     | √   | √ |
| 001      | CD105HS | √   | √   | √ |      |     |   |      |     |   |     |     |   | √     | √   | √ |
| 001      | CD105HS | √   | √   |   |      |     |   |      |     |   |     |     |   | √     | √   | √ |
| 001      | CD105HS |     |     |   |      |     |   |      |     |   | √   |     | √ | √     | √   | √ |
| 220      | CD105HS | √   | √   |   |      |     |   |      |     |   |     |     |   | √     | √   |   |
| 220      | CD105HS | √   | -   | √ |      | -   |   |      | -   |   | √   | -   | √ |       | -   |   |
| 002      | CD105HS |     |     |   |      |     |   |      |     |   | √   |     | √ | √     | √   | √ |
| 002      | CD105HS |     |     | - |      |     | - |      |     |   |     | √   | - | √     | √   | - |
| 005      | CD105HS | √   | √   | √ |      |     |   |      |     |   |     |     |   | √     | √   | √ |
| 005      | CD105HS |     |     | - |      |     | - |      |     |   |     |     | - | √     | √   | - |
| 021      | CD105HS |     |     |   |      |     |   |      |     |   |     |     |   | √     | √   |   |
| 027      | CD105HS | √   | √   | √ |      |     |   |      |     |   |     |     |   | √     | √   | √ |
| 012      | CD105HS | √   | √   | √ |      |     |   |      |     |   |     |     |   | √     | √   | √ |
| N/A      | CD105HS |     |     | - |      |     | - | √    | √   | - | √   | √   | - | √     | √   | - |

Abbreviations: N/A = not assignable, MC= mitocmycin C, NFX = norfloxacin, C = untreated control, MMs = medium myoviruses, LTMs = long tailed myoviruses, SMVs = small myoviruses, SVs = siphoviruses, PTLPs = phage tail-like particles and symbols “-” = negative and “√”= positive.
